# Supplementary material for: Laser engineering of heterostructured graphitic petals on carbon nanotube forests for robust thermal interface capable of swift heat transfer
Source: Royal Society of Chemistry journal article supplement (doi:10.1039/d3ma00134b), 2023-01-01
Supplement: d3ma00134b1.pdf [file d3ma00134b1.pdf]

### Electronic supplementary information

#### Laser-engineering of heterostructured graphitic petals on carbon nanotubes forests (GP/CNTF) for robust thermal interface capable of swift heat transfer

Prashant Kumar<sup>a,b,c,\*</sup>, Qiong Nian<sup>a,b</sup>, Guoping Xiong<sup>a,d</sup>, Timothy S. Fisher<sup>a,d</sup> and Gary J. Cheng<sup>a,b,d,\*</sup>

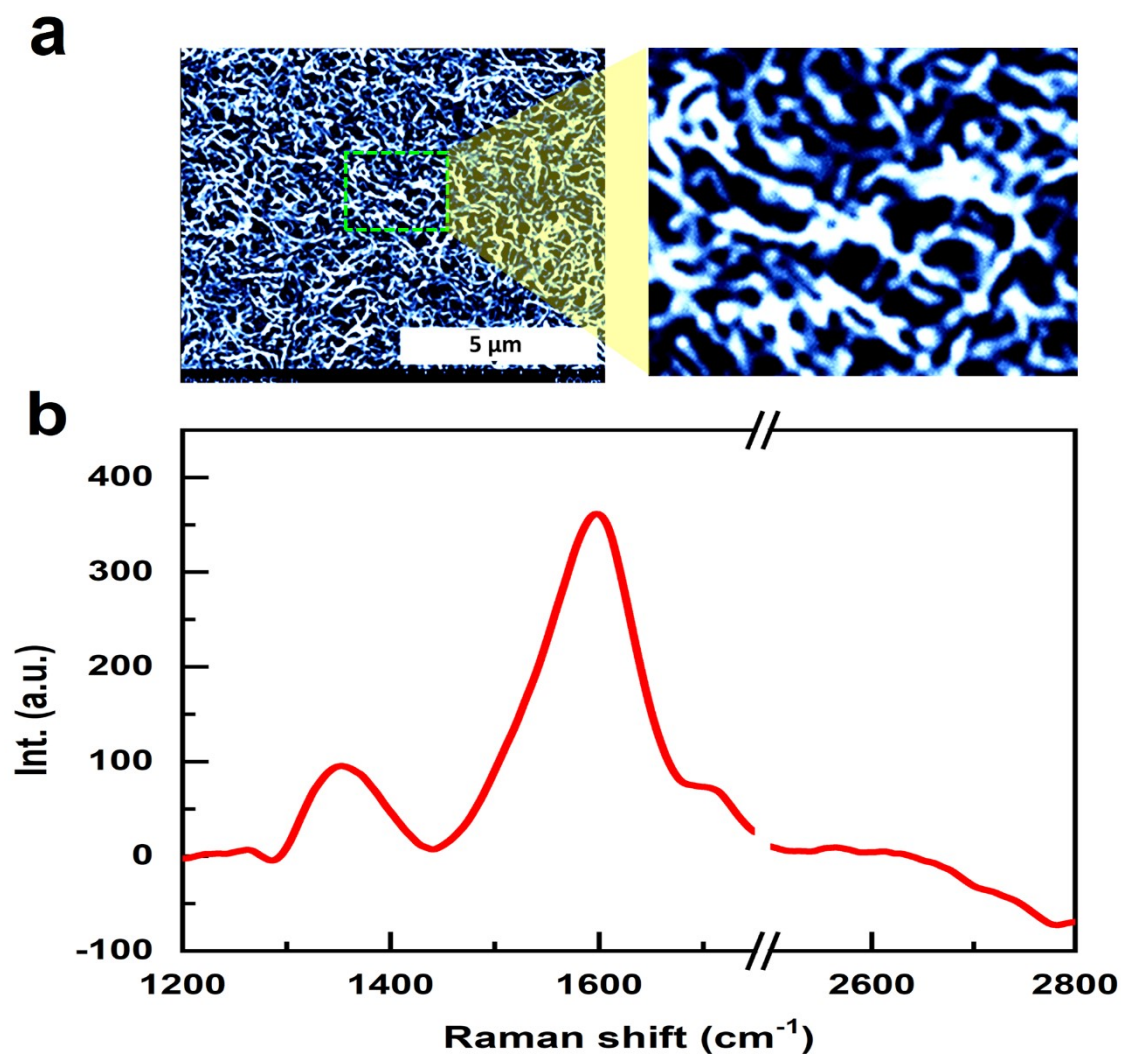

**Figure S1** (a) FESEM image and (b) Raman spectrum of CNTF laser annealed for 3 minutes at 5 Hz pulse rate at laser fluence value of 0.8 J/cm<sup>2</sup>.

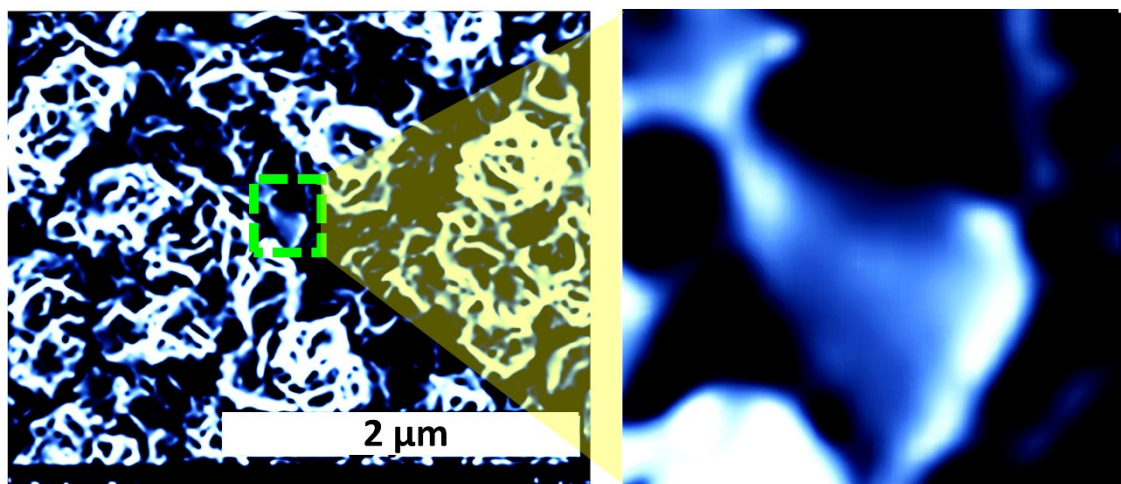

**Figure S2** FESEM image of GP/CNTF laser annealed for 10 minutes at 5 Hz pulse rate at laser fluence value of 0.8 J/cm<sup>2</sup>.

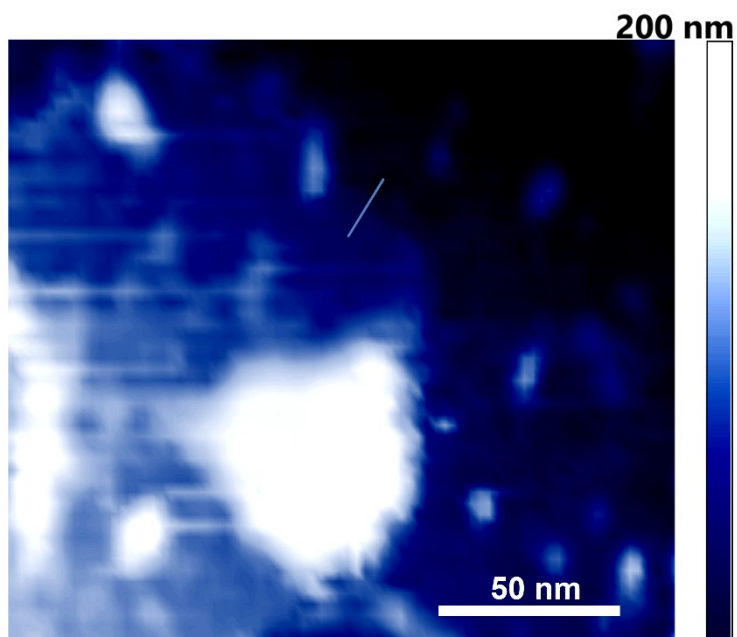

**Figure S3** AFM image of GP/CNTF laser annealed for 10 minutes at 5 Hz pulse rate at laser fluence value of 0.8 J/cm<sup>2</sup>.

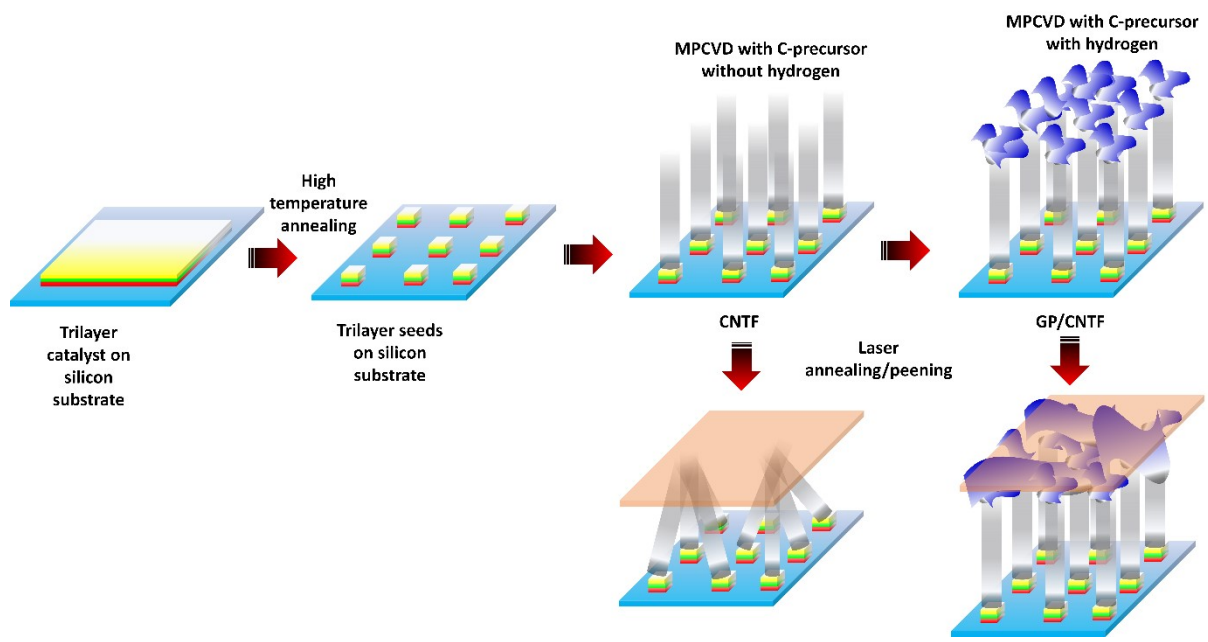

**Figure S4** Schematic diagram showing growth of CNTF and GP/CNTF and laser annealing/shock peening.

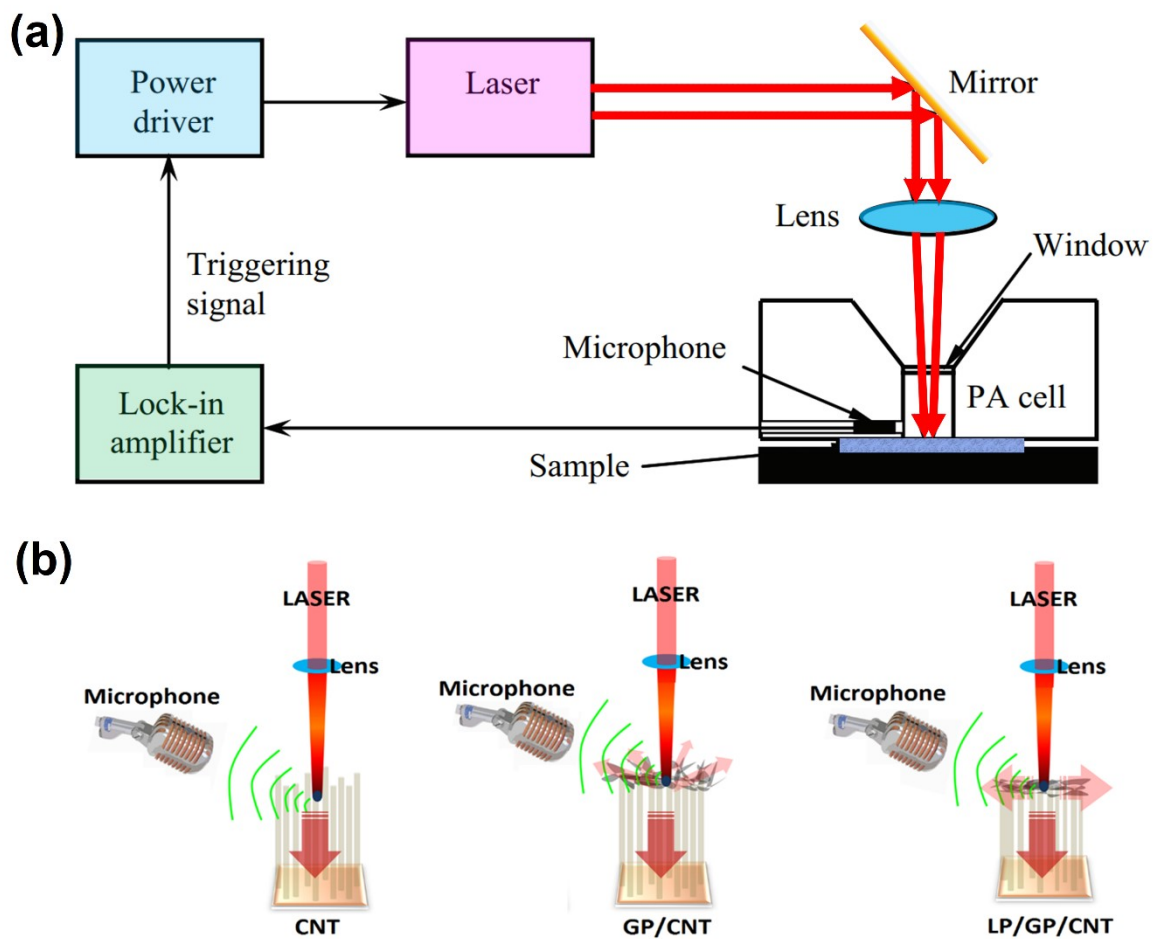

**Figure S5.** (a) Photo-acoustic (PA) testing of samples for thermal interface resistance at 34 and 138 kPa Helium pressure. (b) PA on various samples.
